# Supplementary material for: High-performance printable hybrid perovskite solar cells with an easily accessible n-doped fullerene as a cathode interfacial layer
Source: Royal Society of Chemistry journal article supplement (doi:10.1039/c6cp06486h), 2016-01-01
Supplement: c6cp06486h1.pdf [file c6cp06486h1.pdf]

## Electronic Supplementary Information

# High-performance printable hybrid perovskite solar cells with an easily accessible n-doped fullerene as cathode interfacial layer

Chih-Yu Chang,<sup>\*a</sup> Bo-Chou Tsai,<sup>a</sup> Yu-Cheng Hsiao,<sup>a</sup> Yu-Ching Huang,<sup>b</sup> and Cheng-Si Tsao<sup>b,c</sup>

<sup>a</sup> Department of Materials Science and Engineering, Feng Chia University, Taichung, Taiwan 40724, R.O.C.

<sup>b</sup> Institute of Nuclear Energy Research, Longtan, Taoyuan, Taiwan 32546, R.O.C.

<sup>c</sup> Department of Materials Science and Engineering, National Taiwan University, Taipei, Taiwan 10617, R. O. C.

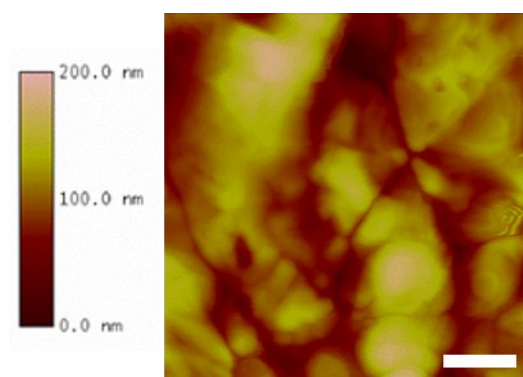

Fig. S1 AFM topographical image of pristine FAPbI<sub>3</sub> film (scale bar = 400 nm).

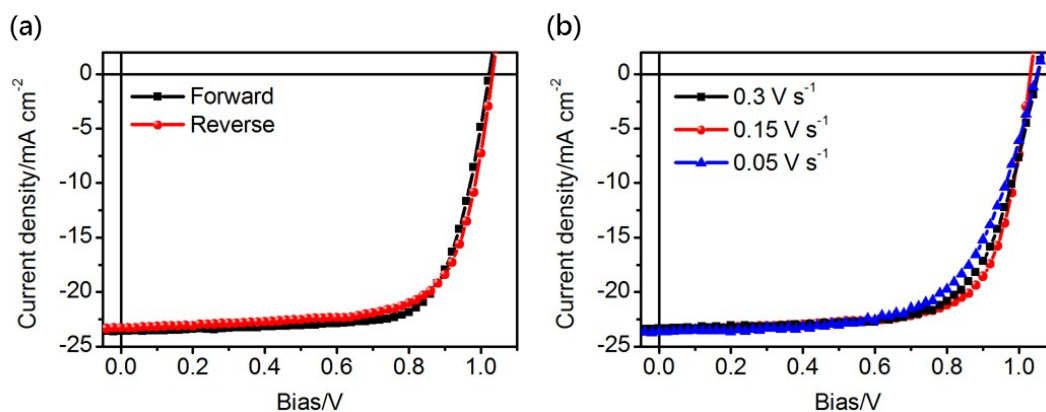

Fig. S2 *J-V* characteristics of device B measured under simulated AM 1.5 solar irradiation with: (a) different sweep directions (scan rate = 0.15 V s<sup>-1</sup>) and (b) different voltage sweep rates.

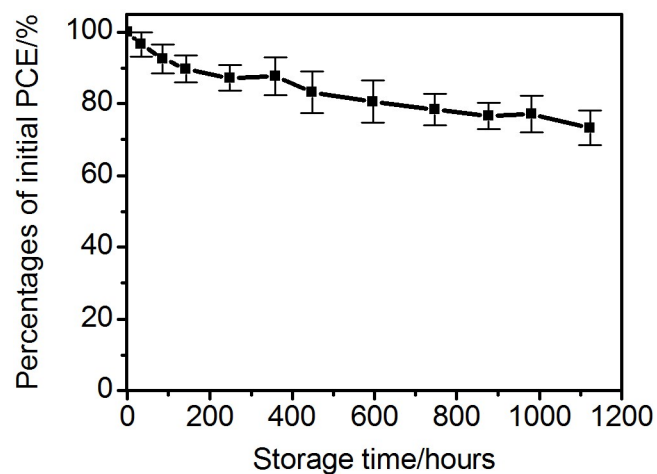

**Fig. S3** Degradation profile of the encapsulated devices (device F) as a function of storage time in ambient conditions (30 °C, ~60% relative humidity). The statistical data were collected from more than 5 devices.

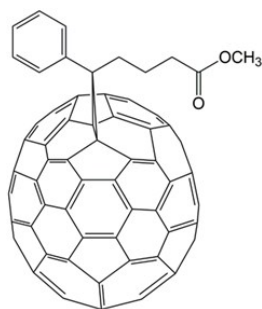

**Fig. S4** Chemical structure of PC<sub>71</sub>BM.
